# Supplementary material for: Spatiotemporal Variation of Osmanthus fragrans Phenology in China in Response to Climate Change From 1973 to 1996
Source: Front Plant Sci. 2022 Jan 20;12:716071. doi: 10.3389/fpls.2021.716071 (PMC8811162; doi:10.3389/fpls.2021.716071)
Supplement: Supplementary file 4 [file Table_4.XLSX]

## Sheet: Supplementary data1
		Jan	Feb	Mar	Apr	May	Jun	Jul	Aug	Sep	Oct	Nov	Dec
	Changde	4.62513	6.3708	10.1851	16.8326	21.6656	25.1714	28.489	27.8903	23.2326	17.9228	12.2839	7.15712
	Guilin	7.71922	9.33245	12.6954	18.6603	22.956	26.3164	28.0331	27.9141	25.4446	20.6483	15.3512	10.4888
	Liuzhou	10.1837	11.8507	15.2457	20.775	24.7754	27.5619	28.8741	28.7804	26.996	22.6785	17.4206	12.9054
	Wuhu	2.86263	4.54956	8.8047	15.3838	20.6867	24.5515	27.9185	27.5062	22.8229	17.4497	11.0661	5.08589
	Xi'an	-1.38441	1.60944	6.5953	13.5608	18.5884	23.2103	24.8812	23.9422	18.634	12.812	5.77306	0.084543
	Figure 2 Mean monthly temperatures at the five observation sites.

## Sheet: Supplementary data2
SITE	Latitude	longitude	elevation	year	BBD	FLD	50LD	FFD	PFD	EFD
Liuzhou	24.22	109.23	96.9	1973
Liuzhou	24.22	109.23	96.9	1974
Liuzhou	24.22	109.23	96.9	1975		72
Liuzhou	24.22	109.23	96.9	1976
Liuzhou	24.22	109.23	96.9	1977			67	267	273	282
Liuzhou	24.22	109.23	96.9	1978	35	41	48
Liuzhou	24.22	109.23	96.9	1979
Liuzhou	24.22	109.23	96.9	1980
Liuzhou	24.22	109.23	96.9	1981
Liuzhou	24.22	109.23	96.9	1982
Liuzhou	24.22	109.23	96.9	1983	38	46	55	291	295	310
Liuzhou	24.22	109.23	96.9	1984
Liuzhou	24.22	109.23	96.9	1985	35	41	50	306	307	308
Liuzhou	24.22	109.23	96.9	1986	41	46	58	282	283	286
Liuzhou	24.22	109.23	96.9	1987	48	50	65	300	306	309
Liuzhou	24.22	109.23	96.9	1988	24	50	66	278	282	286
Liuzhou	24.22	109.23	96.9	1989	63	69	74	296	299	305
Liuzhou	24.22	109.23	96.9	1990	50	59	71	305	306	310
Liuzhou	24.22	109.23	96.9	1991	42	47	55	294	296	301
Liuzhou	24.22	109.23	96.9	1992
Liuzhou	24.22	109.23	96.9	1993	50	57	60	283	286	291
Liuzhou	24.22	109.23	96.9	1994	44	55	63	284	285	291
Liuzhou	24.22	109.23	96.9	1995	45	54	61	283	285	291
Liuzhou	24.22	109.23	96.9	1996
Guilin	25.2	110.18	166.7	1973			65	261	288	298
Guilin	25.2	110.18	166.7	1974	55	69	93	247	248	252
Guilin	25.2	110.18	166.7	1975	42	51	70	294	296	297
Guilin	25.2	110.18	166.7	1976	40	46	57	270	289	302
Guilin	25.2	110.18	166.7	1977	58	63	67	262	263	293
Guilin	25.2	110.18	166.7	1978	38	44	63	259	267	294
Guilin	25.2	110.18	166.7	1979	30	37	51	274	276	283
Guilin	25.2	110.18	166.7	1980
Guilin	25.2	110.18	166.7	1981	21	54	75	263		270
Guilin	25.2	110.18	166.7	1982	20	34	55	262	265	268
Guilin	25.2	110.18	166.7	1983	39	75	81	294	301	302
Guilin	25.2	110.18	166.7	1984		82	89	262		269
Guilin	25.2	110.18	166.7	1985	37	61	72
Guilin	25.2	110.18	166.7	1986	45	50	73		283	294
Guilin	25.2	110.18	166.7	1987		38	44
Guilin	25.2	110.18	166.7	1988	72	75	97	278	286	292
Guilin	25.2	110.18	166.7	1989	74	79	98	282	286	293
Guilin	25.2	110.18	166.7	1990	49	69	79	277	282	289
Guilin	25.2	110.18	166.7	1991		71	79	280	284	293
Guilin	25.2	110.18	166.7	1992
Guilin	25.2	110.18	166.7	1993	43	53	77	278	287	295
Guilin	25.2	110.18	166.7	1994				261	271	277
Guilin	25.2	110.18	166.7	1995				279	283	289
Guilin	25.2	110.18	166.7	1996
Changde	28.56	111.33	35	1973	52	64	78	259	262	266
Changde	28.56	111.33	35	1974	49	83	90	268	271	275
Changde	28.56	111.33	35	1975	43	59	71	262	265	268
Changde	28.56	111.33	35	1976
Changde	28.56	111.33	35	1977	62	78	82
Changde	28.56	111.33	35	1978	52	57	80	259	263	266
Changde	28.56	111.33	35	1979	48	51	73	264	267	271
Changde	28.56	111.33	35	1980	70	86	97	257	261	264
Changde	28.56	111.33	35	1981	63	77	84
Changde	28.56	111.33	35	1982
Changde	28.56	111.33	35	1983	51	73	87	258	263	268
Changde	28.56	111.33	35	1984	81	92	101	263	265	268
Changde	28.56	111.33	35	1985	91	65	114	263	267	275
Changde	28.56	111.33	35	1986	85	90	100	259	261	269
Changde	28.56	111.33	35	1987			98	272	276	281
Changde	28.56	111.33	35	1988	72	81	94	265	266
Changde	28.56	111.33	35	1989	70	78	100	253	255	259
Changde	28.56	111.33	35	1990	74	79	97	274	280	286
Changde	28.56	111.33	35	1991	76	83	102	271	275	280
Changde	28.56	111.33	35	1992
Changde	28.56	111.33	35	1993
Changde	28.56	111.33	35	1994
Changde	28.56	111.33	35	1995
Changde	28.56	111.33	35	1996
Wuhu	31.41	118.31	23.4	1973
Wuhu	31.41	118.31	23.4	1974
Wuhu	31.41	118.31	23.4	1975
Wuhu	31.41	118.31	23.4	1976
Wuhu	31.41	118.31	23.4	1977
Wuhu	31.41	118.31	23.4	1978
Wuhu	31.41	118.31	23.4	1979
Wuhu	31.41	118.31	23.4	1980
Wuhu	31.41	118.31	23.4	1981	73	78	90	263	267	271
Wuhu	31.41	118.31	23.4	1982	57	74	83	258	266	281
Wuhu	31.41	118.31	23.4	1983	81	81	98	270	275	283
Wuhu	31.41	118.31	23.4	1984	83	99	103	252	262	268
Wuhu	31.41	118.31	23.4	1985	87	100	108	272	272	277
Wuhu	31.41	118.31	23.4	1986		77	107	262	265	269
Wuhu	31.41	118.31	23.4	1987	42	79	97	267	275	279
Wuhu	31.41	118.31	23.4	1988	78	90	109	259	265	272
Wuhu	31.41	118.31	23.4	1989		77	92	255	261
Wuhu	31.41	118.31	23.4	1990	77	82	88	262	265	272
Wuhu	31.41	118.31	23.4	1991		75	97	258	276	279
Wuhu	31.41	118.31	23.4	1992
Wuhu	31.41	118.31	23.4	1993
Wuhu	31.41	118.31	23.4	1994	51	69	85	261	266	272
Wuhu	31.41	118.31	23.4	1995	69	77	90	266	277	290
Wuhu	31.41	118.31	23.4	1996	68	99	110	269	274	279
Xi'an	34.56	108.59	719	1973
Xi'an	34.56	108.59	719	1974	77	100	109
Xi'an	34.56	108.59	719	1975	70	96	99	259	263	269
Xi'an	34.56	108.59	719	1976	77	98	102	226	251	265
Xi'an	34.56	108.59	719	1977	74	95	99	250	258	277
Xi'an	34.56	108.59	719	1978	89	105	107	168	173	190
Xi'an	34.56	108.59	719	1979	75	93	100	247	249	254
Xi'an	34.56	108.59	719	1980	92	98	105	255	257	263
Xi'an	34.56	108.59	719	1981	73	80	85	237	239	247
Xi'an	34.56	108.59	719	1982	66	89	95	240	242	247
Xi'an	34.56	108.59	719	1983	77	94	97	236	238	247
Xi'an	34.56	108.59	719	1984	87	92	95	247		258
Xi'an	34.56	108.59	719	1985	85	95	98	249	252	270
Xi'an	34.56	108.59	719	1986	76	93	97	241	243	249
Xi'an	34.56	108.59	719	1987		89	96	264		269
Xi'an	34.56	108.59	719	1988	93	107	110
Xi'an	34.56	108.59	719	1989
Xi'an	34.56	108.59	719	1990		93		232	233	243
Xi'an	34.56	108.59	719	1991	91	98	105	245		266
Xi'an	34.56	108.59	719	1992
Xi'an	34.56	108.59	719	1993				261		267
Xi'an	34.56	108.59	719	1994		94	102	256	264	268
Xi'an	34.56	108.59	719	1995		87	98	258	261	266
Xi'an	34.56	108.59	719	1996	105	109	117	256	258	264

## Sheet: Supplementary data3
SITE	Latitude	longitude	elevation	year	BBD	FLD	50LD	FFD	PFD	EFD
Liuzhou	24.22	109.23	96.9	1973
Liuzhou	24.22	109.23	96.9	1974
Liuzhou	24.22	109.23	96.9	1975		72
Liuzhou	24.22	109.23	96.9	1976
Liuzhou	24.22	109.23	96.9	1977			67	267	273	282
Liuzhou	24.22	109.23	96.9	1978	35	41	48
Liuzhou	24.22	109.23	96.9	1979
Liuzhou	24.22	109.23	96.9	1980
Liuzhou	24.22	109.23	96.9	1981
Liuzhou	24.22	109.23	96.9	1982
Liuzhou	24.22	109.23	96.9	1983	38	46	55	291	295	310
Liuzhou	24.22	109.23	96.9	1984
Liuzhou	24.22	109.23	96.9	1985	35		50	306	307	308
Liuzhou	24.22	109.23	96.9	1986	41	46	58	282	283	286
Liuzhou	24.22	109.23	96.9	1987	48	50	65	300	306	309
Liuzhou	24.22	109.23	96.9	1988	24	50	66	278	282	286
Liuzhou	24.22	109.23	96.9	1989	63	69	74	296	299	305
Liuzhou	24.22	109.23	96.9	1990	50	59	71	305	306	310
Liuzhou	24.22	109.23	96.9	1991	42	47	55	294	296	301
Liuzhou	24.22	109.23	96.9	1992
Liuzhou	24.22	109.23	96.9	1993	50	57	60	283	286	291
Liuzhou	24.22	109.23	96.9	1994	44	55	63	284	285	291
Liuzhou	24.22	109.23	96.9	1995	45	54	61	283	285	291
Liuzhou	24.22	109.23	96.9	1996
Guilin	25.2	110.18	166.7	1973			65	261	288	298
Guilin	25.2	110.18	166.7	1974	55	69	93	247	248	252
Guilin	25.2	110.18	166.7	1975	42	51	70	294	296	297
Guilin	25.2	110.18	166.7	1976	40	46	57	270	289	302
Guilin	25.2	110.18	166.7	1977	58	63	67	262	263	293
Guilin	25.2	110.18	166.7	1978	38	44	63	259	267	294
Guilin	25.2	110.18	166.7	1979	30	37	51	274	276	283
Guilin	25.2	110.18	166.7	1980
Guilin	25.2	110.18	166.7	1981	21	54	75	263		270
Guilin	25.2	110.18	166.7	1982	20	34	55	262	265	268
Guilin	25.2	110.18	166.7	1983	39	75	81	294	301	302
Guilin	25.2	110.18	166.7	1984		82	89	262		269
Guilin	25.2	110.18	166.7	1985	37	61	72
Guilin	25.2	110.18	166.7	1986	45	50	73		283	294
Guilin	25.2	110.18	166.7	1987		38	44
Guilin	25.2	110.18	166.7	1988	72	75	97	278	286	292
Guilin	25.2	110.18	166.7	1989	74	79	98	282	286	293
Guilin	25.2	110.18	166.7	1990	49	69	79	277	282	289
Guilin	25.2	110.18	166.7	1991		71	79	280	284	293
Guilin	25.2	110.18	166.7	1992
Guilin	25.2	110.18	166.7	1993	43	53	77	278	287	295
Guilin	25.2	110.18	166.7	1994				261	271	277
Guilin	25.2	110.18	166.7	1995				279	283	289
Guilin	25.2	110.18	166.7	1996
Changde	28.56	111.33	35	1973	52	64	78	259	262	266
Changde	28.56	111.33	35	1974	49	83	90	268	271	275
Changde	28.56	111.33	35	1975	43	59	71	262	265	268
Changde	28.56	111.33	35	1976
Changde	28.56	111.33	35	1977	62	78	82
Changde	28.56	111.33	35	1978	52	57	80	259	263	266
Changde	28.56	111.33	35	1979	48	51	73	264	267	271
Changde	28.56	111.33	35	1980	70	86	97	257	261	264
Changde	28.56	111.33	35	1981	63	77	84
Changde	28.56	111.33	35	1982
Changde	28.56	111.33	35	1983	51	73	87	258	263	268
Changde	28.56	111.33	35	1984	81	92	101	263	265	268
Changde	28.56	111.33	35	1985	65	91	114	263	267	275
Changde	28.56	111.33	35	1986	85	90	100	259	261	269
Changde	28.56	111.33	35	1987			98	272	276	281
Changde	28.56	111.33	35	1988	72	81	94	265	266
Changde	28.56	111.33	35	1989	70	78	100	253	255	259
Changde	28.56	111.33	35	1990	74	79	97	274	280	286
Changde	28.56	111.33	35	1991	76	83	102	271	275	280
Changde	28.56	111.33	35	1992
Changde	28.56	111.33	35	1993
Changde	28.56	111.33	35	1994
Changde	28.56	111.33	35	1995
Changde	28.56	111.33	35	1996
Wuhu	31.41	118.31	23.4	1973
Wuhu	31.41	118.31	23.4	1974
Wuhu	31.41	118.31	23.4	1975
Wuhu	31.41	118.31	23.4	1976
Wuhu	31.41	118.31	23.4	1977
Wuhu	31.41	118.31	23.4	1978
Wuhu	31.41	118.31	23.4	1979
Wuhu	31.41	118.31	23.4	1980
Wuhu	31.41	118.31	23.4	1981	73	78	90	263	267	271
Wuhu	31.41	118.31	23.4	1982	57	74	83	258	266	281
Wuhu	31.41	118.31	23.4	1983	81	81	98	270	275	283
Wuhu	31.41	118.31	23.4	1984	83	99	103	252	262	268
Wuhu	31.41	118.31	23.4	1985	87	100	108	272	272	277
Wuhu	31.41	118.31	23.4	1986		77	107	262	265	269
Wuhu	31.41	118.31	23.4	1987	42	79	97	267	275	279
Wuhu	31.41	118.31	23.4	1988	78	90	109	259	265	272
Wuhu	31.41	118.31	23.4	1989		77	92	255	261
Wuhu	31.41	118.31	23.4	1990	77	82	88	262	265	272
Wuhu	31.41	118.31	23.4	1991		75	97	258	276	279
Wuhu	31.41	118.31	23.4	1992
Wuhu	31.41	118.31	23.4	1993
Wuhu	31.41	118.31	23.4	1994	51	69	85	261	266	272
Wuhu	31.41	118.31	23.4	1995	69	77	90	266	277	290
Wuhu	31.41	118.31	23.4	1996	68	99	110	269	274	279
Xi'an	34.56	108.59	719	1973
Xi'an	34.56	108.59	719	1974	77	100	109
Xi'an	34.56	108.59	719	1975	70	96	99	259	263	269
Xi'an	34.56	108.59	719	1976	77	98	102	226	251	265
Xi'an	34.56	108.59	719	1977	74	95	99	250	258	277
Xi'an	34.56	108.59	719	1978	89	105	107
Xi'an	34.56	108.59	719	1979	75	93	100	247	249	254
Xi'an	34.56	108.59	719	1980	92	98	105	255	257	263
Xi'an	34.56	108.59	719	1981	73	80	85	237	239	247
Xi'an	34.56	108.59	719	1982	66	89	95	240	242	247
Xi'an	34.56	108.59	719	1983	77	94	97	236	238	247
Xi'an	34.56	108.59	719	1984	87	92	95	247		258
Xi'an	34.56	108.59	719	1985	85	95	98	249	252	270
Xi'an	34.56	108.59	719	1986	76	93	97	241	243	249
Xi'an	34.56	108.59	719	1987		89	96	264		269
Xi'an	34.56	108.59	719	1988	93	107	110
Xi'an	34.56	108.59	719	1989
Xi'an	34.56	108.59	719	1990		93		232	233	243
Xi'an	34.56	108.59	719	1991	91	98	105	245		266
Xi'an	34.56	108.59	719	1992
Xi'an	34.56	108.59	719	1993				261		267
Xi'an	34.56	108.59	719	1994		94	102	256	264	268
Xi'an	34.56	108.59	719	1995		87	98	258	261	266
Xi'an	34.56	108.59	719	1996	105	109	117	256	258	264
Table 1. Number of years of phenological period during 1973 -1996 years at each location.

## Sheet: Supplementary data4
SITE	Latitude	longitude	elevation	year	TM-0	TM-5	TM-10	PPT	SSH	BBD	FLD	50LD
Liuzhou	24.22	109.23	96.9	1973	1909.3	1309.3	751.8	319.9	246
Liuzhou	24.22	109.23	96.9	1974	1680.3	1089.7	617.1	303.7	386.9
Liuzhou	24.22	109.23	96.9	1975	1882.5	1282.5	712.9	343.4	208.6		72
Liuzhou	24.22	109.23	96.9	1976	1702.6	1097.6	541.5	244.3	245.4
Liuzhou	24.22	109.23	96.9	1977	1692.9	1115.3	671	184.2	287.1			67
Liuzhou	24.22	109.23	96.9	1978	1822.7	1226	692.9	266	272.1	35	41	48
Liuzhou	24.22	109.23	96.9	1979	1871.9	1274	723.2	486.4	197.1
Liuzhou	24.22	109.23	96.9	1980	1619.5	1025.9	509.5	378.3	139.5
Liuzhou	24.22	109.23	96.9	1981	1859.9	1262.4	733.6	472.3	243.9
Liuzhou	24.22	109.23	96.9	1982	1776.4	1178	639.5	325.3	165.4
Liuzhou	24.22	109.23	96.9	1983	1670.2	1076.6	556.6	474.2	292.4	38	46	55
Liuzhou	24.22	109.23	96.9	1984	1522.7	933.1	481	243.2	183
Liuzhou	24.22	109.23	96.9	1985	1587.9	987.9	488.9	353.9	194.1	35		50
Liuzhou	24.22	109.23	96.9	1986	1816.3	1217.8	661.4	294.8	301.6	41	46	58
Liuzhou	24.22	109.23	96.9	1987	2048.9	1448.9	869.3	147.3	337.4	48	50	65
Liuzhou	24.22	109.23	96.9	1988	1568.3	966.4	466.9	251.7	201.9	24	50	66
Liuzhou	24.22	109.23	96.9	1989	1692.7	1100.2	611.8	395.8	189.5	63	69	74
Liuzhou	24.22	109.23	96.9	1990	1795.6	1199.9	666	484.7	198.9	50	59	71
Liuzhou	24.22	109.23	96.9	1991	1797.5	1197.5	630.2	159.8	156.8	42	47	55
Liuzhou	24.22	109.23	96.9	1992	1730.9	1125.9	587.4	320.8	270.8
Liuzhou	24.22	109.23	96.9	1993	1767	1170.2	655.5	378.6	252.6	50	57	60
Liuzhou	24.22	109.23	96.9	1994	1781.9	1183.1	637.2	261	171.3	44	55	63
Liuzhou	24.22	109.23	96.9	1995	1720	1120	576.9	366.2	125.9	45	54	61
Liuzhou	24.22	109.23	96.9	1996	1594.5	1002.7	498.6	487.3	274.1
Guilin	25.2	110.18	166.7	1973	1588.5	989.8	498	627.4	188.6			65
Guilin	25.2	110.18	166.7	1974	1447.8	894.7	479	502.8	426.9	55	69	93
Guilin	25.2	110.18	166.7	1975	1566.6	966.9	443.9	740	206.9	42	51	70
Guilin	25.2	110.18	166.7	1976	1406.3	806.8	331.9	360.7	227.6	40	46	57
Guilin	25.2	110.18	166.7	1977	1430.9	899.1	513	335.2	336.4	58	63	67
Guilin	25.2	110.18	166.7	1978	1496.2	917.3	448.7	626.8	249.5	38	44	63
Guilin	25.2	110.18	166.7	1979	1582	994.5	490.8	501.5	245.3	30	37	51
Guilin	25.2	110.18	166.7	1980	1297.9	725	292.5	722.1	124.2
Guilin	25.2	110.18	166.7	1981	1533.9	952.4	500.2	777.5	170.3	21	54	75
Guilin	25.2	110.18	166.7	1982	1454	867.4	384.3	606	197.9	20	34	55
Guilin	25.2	110.18	166.7	1983	1398.9	819.7	367.8	467.3	252.2	39	75	81
Guilin	25.2	110.18	166.7	1984	1279.4	727.3	339.3	293.2	163.6		82	89
Guilin	25.2	110.18	166.7	1985	1355.8	772.8	353.3	567.7	216.6	37	61	72
Guilin	25.2	110.18	166.7	1986	1515.8	919.6	429.1	369.6	237.2	45	50	73
Guilin	25.2	110.18	166.7	1987	1664.6	1066.7	530.7	525.3	340.5		38	44
Guilin	25.2	110.18	166.7	1988	1297.6	714.7	312.1	331.9	225.4	72	75	97
Guilin	25.2	110.18	166.7	1989	1383.4	814.4	388.9	553.2	199.5	74	79	98
Guilin	25.2	110.18	166.7	1990	1472	891.8	429.5	723.6	188.4	49	69	79
Guilin	25.2	110.18	166.7	1991	1467.7	868.7	381.5	487.3	145.1		71	79
Guilin	25.2	110.18	166.7	1992	1490.8	887.3	454.2	600.7	283.6
Guilin	25.2	110.18	166.7	1993	1490.5	914.5	446.5	682.8	272.5	43	53	77
Guilin	25.2	110.18	166.7	1994	1500.8	909.2	430.1	486.3	216.3
Guilin	25.2	110.18	166.7	1995	1483.4	886.8	399	563.7	187
Guilin	25.2	110.18	166.7	1996	1351.8	780.6	354.8	793.2	282.4
Changde	28.56	111.33	35	1973	1237.8	671.9	322.7	345.4	265.2	52	64	78
Changde	28.56	111.33	35	1974	1113.6	654.4	328.4	333.4	288.2	49	83	90
Changde	28.56	111.33	35	1975	1229	643	248.4	415.6	218.2	43	59	71
Changde	28.56	111.33	35	1976	1093.6	536	187.7	316.6	324.2
Changde	28.56	111.33	35	1977	1154.1	681.6	336.8	444.7	384.9	62	78	82
Changde	28.56	111.33	35	1978	1196.1	648.4	274.7	296.3	445.9	52	57	80
Changde	28.56	111.33	35	1979	1232.8	683.2	283.2	207.1	480.6	48	51	73
Changde	28.56	111.33	35	1980	999.6	484.9	192	472.7	271.8	70	86	97
Changde	28.56	111.33	35	1981	1176.6	655	294.1	431.6	341.1	63	77	84
Changde	28.56	111.33	35	1982	1098.7	570.8	230.1	481.2	300.5
Changde	28.56	111.33	35	1983	1113.6	582.9	236.9	335.5	284.3	51	73	87
Changde	28.56	111.33	35	1984	1009.4	533.3	224.1	377.8	297.8	81	92	101
Changde	28.56	111.33	35	1985	1073	549.2	237.7	363.3	292.4	65	91	114
Changde	28.56	111.33	35	1986	1206.2	633.7	267.6	382.8	342.5	85	90	100
Changde	28.56	111.33	35	1987	1214.9	635.9	268.1	341.9	361.7			98
Changde	28.56	111.33	35	1988	1101.3	570.6	277	225.7	382.9	72	81	94
Changde	28.56	111.33	35	1989	1072.6	550.9	240.5	582.9	288.2	70	78	100
Changde	28.56	111.33	35	1990	1132	590.1	263.1	389.5	331.8	74	79	97
Changde	28.56	111.33	35	1991	1111.1	533.9	184.7	530.2	309.4	76	83	102
Changde	28.56	111.33	35	1992	1225.8	667.6	323.2	482.3	435.8
Changde	28.56	111.33	35	1993	1193.8	666.2	286.5	469.1	446.5
Changde	28.56	111.33	35	1994	1205.5	637.7	280.9	402.5	351.3
Changde	28.56	111.33	35	1995	1212.3	642.5	251	476.6	387.4
Changde	28.56	111.33	35	1996	1125.7	601.5	249.8	283.9	385.1
Wuhu	31.41	118.31	23.4	1973	1085.2	567.3	264.5	279.7	470.2
Wuhu	31.41	118.31	23.4	1974	961.9	515.5	244	180.8	640.7
Wuhu	31.41	118.31	23.4	1975	1019.9	481	180.9	233.1	540.4
Wuhu	31.41	118.31	23.4	1976	978.6	459.8	156.5	258.2	607.3
Wuhu	31.41	118.31	23.4	1977	933.6	548.3	241.1	261.8	490.1
Wuhu	31.41	118.31	23.4	1978	983.7	509.1	215.1	143.3	656.5
Wuhu	31.41	118.31	23.4	1979	1072.6	555.7	195.1	253.8	586.5
Wuhu	31.41	118.31	23.4	1980	860.2	391	144.6	273.2	511.2
Wuhu	31.41	118.31	23.4	1981	975.7	525.2	215.4	238.3	499.3	73	78	90
Wuhu	31.41	118.31	23.4	1982	927.9	446.4	166.1	228.8	518.7	57	74	83
Wuhu	31.41	118.31	23.4	1983	950.7	458.3	185.8	212.2	613.9	81	81	98
Wuhu	31.41	118.31	23.4	1984	814.5	405.3	147.7	184.2	547.3	83	99	103
Wuhu	31.41	118.31	23.4	1985	877	426.4	186.5	216.4	549.8	87	100	108
Wuhu	31.41	118.31	23.4	1986	927.4	448.7	172.3	128.4	569.7		77	107
Wuhu	31.41	118.31	23.4	1987	964.4	458.4	191.1	392.1	548.7	42	79	97
Wuhu	31.41	118.31	23.4	1988	904.2	441.2	211.3	229.9	530.3	78	90	109
Wuhu	31.41	118.31	23.4	1989	995.6	492.6	184	312.9	463.6		77	92
Wuhu	31.41	118.31	23.4	1990	1014.8	532	211.2	313.5	504.9	77	82	88
Wuhu	31.41	118.31	23.4	1991	930.6	415.4	150.3	420.4	449.9		75	97
Wuhu	31.41	118.31	23.4	1992	1009.1	517.1	234.8	326.1	582.6
Wuhu	31.41	118.31	23.4	1993	996.9	507.8	198.8	369.7	593.7
Wuhu	31.41	118.31	23.4	1994	1025.7	514.1	221.5	222.3	498.3	51	69	85
Wuhu	31.41	118.31	23.4	1995	1024.8	507.5	192.5	197.4	615.5	69	77	90
Wuhu	31.41	118.31	23.4	1996	906.1	436.7	180.3	270.5	526.6	68	99	110
Xi'an	34.56	108.59	719	1973	820.7	439.4	194.3	49.2	645.8
Xi'an	34.56	108.59	719	1974	680.9	357.4	169.4	45	648.5	77	100	109
Xi'an	34.56	108.59	719	1975	665.5	304.3	85.6	94.6	641.2	70	96	99
Xi'an	34.56	108.59	719	1976	603.5	244.4	76.5	107.5	629.9	77	98	102
Xi'an	34.56	108.59	719	1977	797.7	450.3	171.2	51.6	727.6	74	95	99
Xi'an	34.56	108.59	719	1978	757.7	399.4	179.9	37.6	803.2	89	105	107
Xi'an	34.56	108.59	719	1979	753.4	333.6	121.8	25	755.6	75	93	100
Xi'an	34.56	108.59	719	1980	670.1	329.3	129.3	35.5	731.7	92	98	105
Xi'an	34.56	108.59	719	1981	753.1	398.7	140.8	74	738.2	73	80	85
Xi'an	34.56	108.59	719	1982	713.8	338.1	112	57.5	694.4	66	89	95
Xi'an	34.56	108.59	719	1983	670	323.6	124.3	81.4	725.4	77	94	97
Xi'an	34.56	108.59	719	1984	649.2	331.4	126.7	37.2	612	87	92	95
Xi'an	34.56	108.59	719	1985	628.6	306.8	130.6	49.6	593.5	85	95	98
Xi'an	34.56	108.59	719	1986	679.5	325.6	102.7	46.9	699.2	76	93	97
Xi'an	34.56	108.59	719	1987	737.4	356.6	147.4	61.6	724.3		89	96
Xi'an	34.56	108.59	719	1988	590.9	285.1	118.9	101	630.6	93	107	110
Xi'an	34.56	108.59	719	1989	624.2	318.7	119.2	124	502.3
Xi'an	34.56	108.59	719	1990	652.1	311.1	90.7	111.8	590.4		93
Xi'an	34.56	108.59	719	1991	694.7	305.9	105	108	621.5	91	98	105
Xi'an	34.56	108.59	719	1992	719	382.9	165.8	61.5	783.3
Xi'an	34.56	108.59	719	1993	722.6	347.6	140.5	61	652.3
Xi'an	34.56	108.59	719	1994	711.6	360.7	151.5	96.3	695.7		94	102
Xi'an	34.56	108.59	719	1995	718.7	323.9	104.1	42.8	737.9		87	98
Xi'an	34.56	108.59	719	1996	617.5	276.8	104.4	50.3	673.7	105	109	117
Table S1. Partial correlation coefficient of phenological metrices with climatic factors using 0 ℃ and 10℃ as GDD temperature threshold. BBD, date of bud-burst; FLD, date of first leaf unfolding; 50LD, date of 50% of leaf unfolding; FFD, first flowering day; PFD, peak flowering day; EFD, end of flowering day. GDD, PPT and SSD indicate the growing degree-days, accumulated precipitation and sunshin…

## Sheet: Supplementary data5
SITE	Latitude	longitude	elevation	year	:20-TM	25-TM	30-TM	PPT1	SSH1	始花期	盛花期	谢花期
Liuzhou	24.22	109.23	96.9	1973	14.7	116.6	464.5	434.2	747.4
Liuzhou	24.22	109.23	96.9	1974	3.9	75.3	435.2	810.2	778.5
Liuzhou	24.22	109.23	96.9	1975	24.5	98.6	373.8	415.9	790
Liuzhou	24.22	109.23	96.9	1976	14.7	122.5	498.2	759.6	685.9
Liuzhou	24.22	109.23	96.9	1977	1.7	82.4	428.7	636.2	764.7	267	273	282
Liuzhou	24.22	109.23	96.9	1978	17.2	76.3	395.5	290.9	836.7
Liuzhou	24.22	109.23	96.9	1979	0.2	69.5	409.8	467.1	896
Liuzhou	24.22	109.23	96.9	1980	12.6	75.8	407.1	598.6	857.6
Liuzhou	24.22	109.23	96.9	1981	22.6	118.7	416.8	401.2	734.4
Liuzhou	24.22	109.23	96.9	1982	4.9	58.1	352.1	728	756.1
Liuzhou	24.22	109.23	96.9	1983	15.9	80.4	346.2	719.9	815.6	291	295	310
Liuzhou	24.22	109.23	96.9	1984	20.4	144.5	460.5	388.7	773.2
Liuzhou	24.22	109.23	96.9	1985	13.7	78.4	350.5	249	839.1	306	307	308
Liuzhou	24.22	109.23	96.9	1986	21.9	121.7	415.7	405.4	809	282	283	286
Liuzhou	24.22	109.23	96.9	1987	30.1	105.5	419.7	474.2	732.4	300	306	309
Liuzhou	24.22	109.23	96.9	1988	21.5	97.9	434.2	400.2	716	278	282	286
Liuzhou	24.22	109.23	96.9	1989	10.2	66.9	352.1	321.9	802.2	296	299	305
Liuzhou	24.22	109.23	96.9	1990	5.4	64.2	329.6	343.5	784.8	305	306	310
Liuzhou	24.22	109.23	96.9	1991	10.2	102.5	358.4	239.5	779.6	294	296	301
Liuzhou	24.22	109.23	96.9	1992	4.6	111.6	382	283.4	815.7
Liuzhou	24.22	109.23	96.9	1993	14.8	118.1	446	577.3	680.8	283	286	291
Liuzhou	24.22	109.23	96.9	1994	26.9	152.6	550.3	1049.7	578.1	284	285	291
Liuzhou	24.22	109.23	96.9	1995	3.5	72.2	376.5	368.6	756	283	285	291
Liuzhou	24.22	109.23	96.9	1996	10.2	57.5	370.4	683.2	784.8
Guilin	25.2	110.18	166.7	1973	35.7	176.8	578.9	586.4	782.4	261	288	298
Guilin	25.2	110.18	166.7	1974	18.9	133.6	546.7	655.6	820.2	247	248	252
Guilin	25.2	110.18	166.7	1975	39.5	148.4	509	408.7	827.9	294	296	297
Guilin	25.2	110.18	166.7	1976	30.2	185	617.4	1033.1	762.7	270	289	302
Guilin	25.2	110.18	166.7	1977	8.1	144.8	554.5	706.5	794.2	262	263	293
Guilin	25.2	110.18	166.7	1978	29.5	157.7	518.9	269.6	935.6	259	267	294
Guilin	25.2	110.18	166.7	1979	6.2	155.8	555.4	419.9	750.3	274	276	283
Guilin	25.2	110.18	166.7	1980	27.2	142.9	562	732.3	692.9
Guilin	25.2	110.18	166.7	1981	57.2	216.2	582.7	447.4	668.8	263		270
Guilin	25.2	110.18	166.7	1982	20.1	134.8	505.6	532.4	678.2	262	265	268
Guilin	25.2	110.18	166.7	1983	26.3	130.6	488.3	652.1	691.3	294	301	302
Guilin	25.2	110.18	166.7	1984	43	211.3	623.2	427.1	701.8	262		269
Guilin	25.2	110.18	166.7	1985	35	165.4	532.7	438.3	607.6
Guilin	25.2	110.18	166.7	1986	43.6	175.5	576.4	612.9	845.6		283	294
Guilin	25.2	110.18	166.7	1987	47	166.6	582.6	670.1	666.2
Guilin	25.2	110.18	166.7	1988	25.2	183.1	603.5	593.4	685.6	278	286	292
Guilin	25.2	110.18	166.7	1989	19.2	132.1	521	423.2	830.3	282	286	293
Guilin	25.2	110.18	166.7	1990	18	140.9	486.5	335.8	808.2	277	282	289
Guilin	25.2	110.18	166.7	1991	36	159.7	516.2	389.6	769.8	280	284	293
Guilin	25.2	110.18	166.7	1992	29.5	177.5	520.2	304	891.2
Guilin	25.2	110.18	166.7	1993	38.3	200	613.7	930	674.4	278	287	295
Guilin	25.2	110.18	166.7	1994	63	246	700.7	796.8	653.8	261	271	277
Guilin	25.2	110.18	166.7	1995	12.3	141.5	523.5	336.5	792.7	279	283	289
Guilin	25.2	110.18	166.7	1996	20.9	115.2	527.1	587.4	790.4
Changde	28.56	111.33	35	1973	96.5	334.9	754.1	756.3	683.6	259	262	266
Changde	28.56	111.33	35	1974	107.1	333	742.5	226	787.3	268	271	275
Changde	28.56	111.33	35	1975	79.8	254.4	618.5	474.5	712.4	262	265	268
Changde	28.56	111.33	35	1976	62.4	302.1	744.5	325	794
Changde	28.56	111.33	35	1977	37.4	258.2	669.1	444.2	754.5
Changde	28.56	111.33	35	1978	83.2	289.4	635.1	270.8	909.7	259	263	266
Changde	28.56	111.33	35	1979	27.5	282.8	696.8	252	778.4	264	267	271
Changde	28.56	111.33	35	1980	78.6	342	850.5	725.3	605.5	257	261	264
Changde	28.56	111.33	35	1981	160.9	388.7	744.2	343.8	754.3
Changde	28.56	111.33	35	1982	63.2	332	776.6	453.6	530.5
Changde	28.56	111.33	35	1983	96.4	308.5	751.3	474.3	542.8	258	263	268
Changde	28.56	111.33	35	1984	107.7	339.3	753.9	462.2	687.7	263	265	268
Changde	28.56	111.33	35	1985	103.7	313.6	682.6	311.9	688	263	267	275
Changde	28.56	111.33	35	1986	110.1	329.1	767.3	385.6	678.6	259	261	269
Changde	28.56	111.33	35	1987	88.2	263.7	677.6	410.4	666.9	272	276	281
Changde	28.56	111.33	35	1988	73.8	317.7	707.2	608.2	745.4	265	266
Changde	28.56	111.33	35	1989	62.3	297.7	743	646.5	696.8	253	255	259
Changde	28.56	111.33	35	1990	60.4	232.9	571.7	308.6	962	274	280	286
Changde	28.56	111.33	35	1991	65	269.2	700.4	377.4	822	271	275	280
Changde	28.56	111.33	35	1992	108.9	331.7	733.8	329.3	845.2
Changde	28.56	111.33	35	1993	76.2	308.7	794	750.4	656.1
Changde	28.56	111.33	35	1994	119.9	354.6	734.1	537.1	733.7
Changde	28.56	111.33	35	1995	78.2	275.1	630.4	366.7	789.5
Changde	28.56	111.33	35	1996	60.5	248.8	671.8	390	677.8
Wuhu	31.41	118.31	23.4	1973	122.4	360.8	738.9	269.9	876.3
Wuhu	31.41	118.31	23.4	1974	109.3	349.5	811.6	392.4	773.3
Wuhu	31.41	118.31	23.4	1975	79	249.3	631.3	500.1	663.9
Wuhu	31.41	118.31	23.4	1976	74.2	342.1	779.6	256.3	849
Wuhu	31.41	118.31	23.4	1977	51.4	273	725	545.9	780.6
Wuhu	31.41	118.31	23.4	1978	87	300.2	618.3	139.1	978.5
Wuhu	31.41	118.31	23.4	1979	69.6	322.6	764.2	467.7	871.5
Wuhu	31.41	118.31	23.4	1980	110.3	397.2	942.2	687.4	588.8
Wuhu	31.41	118.31	23.4	1981	155.7	397.8	831.7	561.8	751.6	263	267	271
Wuhu	31.41	118.31	23.4	1982	64.7	328.5	824	679	623.7	258	266	281
Wuhu	31.41	118.31	23.4	1983	97.6	296	739.8	593.4	743.2	270	275	283
Wuhu	31.41	118.31	23.4	1984	96.4	341	763.9	320.7	788.8	252	262	268
Wuhu	31.41	118.31	23.4	1985	111.4	320.3	732.7	502.9	710.2	272	272	277
Wuhu	31.41	118.31	23.4	1986	122.4	367	840.1	220.6	752.9	262	265	269
Wuhu	31.41	118.31	23.4	1987	82.2	287.1	773.3	801.4	681.6	267	275	279
Wuhu	31.41	118.31	23.4	1988	81.4	332	778.9	304.4	843.4	259	265	272
Wuhu	31.41	118.31	23.4	1989	80.8	329.9	842.2	593.4	725.6	255	261
Wuhu	31.41	118.31	23.4	1990	84.2	307.4	684.4	259.1	831.2	262	265	272
Wuhu	31.41	118.31	23.4	1991	86.2	331.3	790.6	916.2	803.6	258	276	279
Wuhu	31.41	118.31	23.4	1992	137.2	370	821	337	784.2
Wuhu	31.41	118.31	23.4	1993	96.3	348.7	859.6	427.4	666.2
Wuhu	31.41	118.31	23.4	1994	99.6	303	637.9	281.9	825.5	261	266	272
Wuhu	31.41	118.31	23.4	1995	74.1	306.4	667.2	297.4	803.7	266	277	290
Wuhu	31.41	118.31	23.4	1996	66.1	273.3	720.2	592.6	639.7	269	274	279
Xi'an	34.56	108.59	719	1973	330.7	689.3	1214.1	325	883.7
Xi'an	34.56	108.59	719	1974	331	682.8	1225.1	307.4	868.3
Xi'an	34.56	108.59	719	1975	310.6	642.3	1186.9	513.9	701.4	259	263	269
Xi'an	34.56	108.59	719	1976	281.9	701.7	1276.2	446	765.7	226	251	265
Xi'an	34.56	108.59	719	1977	188	520.4	1077.2	206.5	871.8	250	258	277
Xi'an	34.56	108.59	719	1978	283.6	644.1	1209.2	512	879.6
Xi'an	34.56	108.59	719	1979	272.1	636.8	1182.1	325.3	836.9	247	249	254
Xi'an	34.56	108.59	719	1980	283.2	703.5	1302.2	309.5	765.9	255	257	263
Xi'an	34.56	108.59	719	1981	374.8	785.6	1314.9	551.6	636.4	237	239	247
Xi'an	34.56	108.59	719	1982	264.4	693.5	1284.5	414	704.5	240	242	247
Xi'an	34.56	108.59	719	1983	299.6	731.3	1332.7	522.7	479.3	236	238	247
Xi'an	34.56	108.59	719	1984	358.2	783.4	1377.2	449.3	762.8	247		258
Xi'an	34.56	108.59	719	1985	356	712.7	1262.3	330.5	562.7	249	252	270
Xi'an	34.56	108.59	719	1986	295	660.3	1234.8	216.9	835.2	241	243	249
Xi'an	34.56	108.59	719	1987	196.1	508.4	1083.1	191	852	264		269
Xi'an	34.56	108.59	719	1988	280.9	695.1	1277.5	571.5	592.7
Xi'an	34.56	108.59	719	1989	232.4	646.3	1231.6	346.1	689.9
Xi'an	34.56	108.59	719	1990	225.9	567.6	1130.6	211	867.2	232	233	243
Xi'an	34.56	108.59	719	1991	252	571.5	1111.2	161.9	967.1	245		266
Xi'an	34.56	108.59	719	1992	379	742.3	1284.1	324	657.8
Xi'an	34.56	108.59	719	1993	272.1	675.9	1272.1	210.3	793.3	261		267
Xi'an	34.56	108.59	719	1994	329.6	616.7	1121.2	207.7	947.2	256	264	268
Xi'an	34.56	108.59	719	1995	264	589.8	1105.5	312.6	733.9	258	261	266
Xi'an	34.56	108.59	719	1996	257.8	632.4	1203.5	423.6	720.8	256	258	264
Table S2. Partial correlation coefficients of phenological metrices with climatic factors using 20℃ and 30℃ as CDD temperature threshold. BBD, date of bud-burst; FLD, date of first leaf unfolding; 50LD, date of 50% of leaf unfolding; FFD, first flowering day; PFD, peak flowering day; EFD, end of flowering day. CDD, PPT and SSD indicate cold degree-days, accumulated precipitation and sunshine dura…

## Sheet: Supplementary data6
SITE	Latitude	longitude	elevation	year	BBD	FLD	50LD	FFD	PFD	EFD
Liuzhou	24.22	109.23	96.9	1973
Liuzhou	24.22	109.23	96.9	1974
Liuzhou	24.22	109.23	96.9	1975		72
Liuzhou	24.22	109.23	96.9	1976
Liuzhou	24.22	109.23	96.9	1977			67	267	273	282
Liuzhou	24.22	109.23	96.9	1978	35	41	48
Liuzhou	24.22	109.23	96.9	1979
Liuzhou	24.22	109.23	96.9	1980
Liuzhou	24.22	109.23	96.9	1981
Liuzhou	24.22	109.23	96.9	1982
Liuzhou	24.22	109.23	96.9	1983	38	46	55	291	295	310
Liuzhou	24.22	109.23	96.9	1984
Liuzhou	24.22	109.23	96.9	1985	35		50	306	307	308
Liuzhou	24.22	109.23	96.9	1986	41	46	58	282	283	286
Liuzhou	24.22	109.23	96.9	1987	48	50	65	300	306	309
Liuzhou	24.22	109.23	96.9	1988	24	50	66	278	282	286
Liuzhou	24.22	109.23	96.9	1989	63	69	74	296	299	305
Liuzhou	24.22	109.23	96.9	1990	50	59	71	305	306	310
Liuzhou	24.22	109.23	96.9	1991	42	47	55	294	296	301
Liuzhou	24.22	109.23	96.9	1992
Liuzhou	24.22	109.23	96.9	1993	50	57	60	283	286	291
Liuzhou	24.22	109.23	96.9	1994	44	55	63	284	285	291
Liuzhou	24.22	109.23	96.9	1995	45	54	61	283	285	291
Liuzhou	24.22	109.23	96.9	1996
Guilin	25.2	110.18	166.7	1973			65	261	288	298
Guilin	25.2	110.18	166.7	1974	55	69	93	247	248	252
Guilin	25.2	110.18	166.7	1975	42	51	70	294	296	297
Guilin	25.2	110.18	166.7	1976	40	46	57	270	289	302
Guilin	25.2	110.18	166.7	1977	58	63	67	262	263	293
Guilin	25.2	110.18	166.7	1978	38	44	63	259	267	294
Guilin	25.2	110.18	166.7	1979	30	37	51	274	276	283
Guilin	25.2	110.18	166.7	1980
Guilin	25.2	110.18	166.7	1981	21	54	75	263		270
Guilin	25.2	110.18	166.7	1982	20	34	55	262	265	268
Guilin	25.2	110.18	166.7	1983	39	75	81	294	301	302
Guilin	25.2	110.18	166.7	1984		82	89	262		269
Guilin	25.2	110.18	166.7	1985	37	61	72
Guilin	25.2	110.18	166.7	1986	45	50	73		283	294
Guilin	25.2	110.18	166.7	1987		38	44
Guilin	25.2	110.18	166.7	1988	72	75	97	278	286	292
Guilin	25.2	110.18	166.7	1989	74	79	98	282	286	293
Guilin	25.2	110.18	166.7	1990	49	69	79	277	282	289
Guilin	25.2	110.18	166.7	1991		71	79	280	284	293
Guilin	25.2	110.18	166.7	1992
Guilin	25.2	110.18	166.7	1993	43	53	77	278	287	295
Guilin	25.2	110.18	166.7	1994				261	271	277
Guilin	25.2	110.18	166.7	1995				279	283	289
Guilin	25.2	110.18	166.7	1996
Changde	28.56	111.33	35	1973	52	64	78	259	262	266
Changde	28.56	111.33	35	1974	49	83	90	268	271	275
Changde	28.56	111.33	35	1975	43	59	71	262	265	268
Changde	28.56	111.33	35	1976
Changde	28.56	111.33	35	1977	62	78	82
Changde	28.56	111.33	35	1978	52	57	80	259	263	266
Changde	28.56	111.33	35	1979	48	51	73	264	267	271
Changde	28.56	111.33	35	1980	70	86	97	257	261	264
Changde	28.56	111.33	35	1981	63	77	84
Changde	28.56	111.33	35	1982
Changde	28.56	111.33	35	1983	51	73	87	258	263	268
Changde	28.56	111.33	35	1984	81	92	101	263	265	268
Changde	28.56	111.33	35	1985	65	91	114	263	267	275
Changde	28.56	111.33	35	1986	85	90	100	259	261	269
Changde	28.56	111.33	35	1987			98	272	276	281
Changde	28.56	111.33	35	1988	72	81	94	265	266
Changde	28.56	111.33	35	1989	70	78	100	253	255	259
Changde	28.56	111.33	35	1990	74	79	97	274	280	286
Changde	28.56	111.33	35	1991	76	83	102	271	275	280
Changde	28.56	111.33	35	1992
Changde	28.56	111.33	35	1993
Changde	28.56	111.33	35	1994
Changde	28.56	111.33	35	1995
Changde	28.56	111.33	35	1996
Wuhu	31.41	118.31	23.4	1973
Wuhu	31.41	118.31	23.4	1974
Wuhu	31.41	118.31	23.4	1975
Wuhu	31.41	118.31	23.4	1976
Wuhu	31.41	118.31	23.4	1977
Wuhu	31.41	118.31	23.4	1978
Wuhu	31.41	118.31	23.4	1979
Wuhu	31.41	118.31	23.4	1980
Wuhu	31.41	118.31	23.4	1981	73	78	90	263	267	271
Wuhu	31.41	118.31	23.4	1982	57	74	83	258	266	281
Wuhu	31.41	118.31	23.4	1983	81	81	98	270	275	283
Wuhu	31.41	118.31	23.4	1984	83	99	103	252	262	268
Wuhu	31.41	118.31	23.4	1985	87	100	108	272	272	277
Wuhu	31.41	118.31	23.4	1986		77	107	262	265	269
Wuhu	31.41	118.31	23.4	1987	42	79	97	267	275	279
Wuhu	31.41	118.31	23.4	1988	78	90	109	259	265	272
Wuhu	31.41	118.31	23.4	1989		77	92	255	261
Wuhu	31.41	118.31	23.4	1990	77	82	88	262	265	272
Wuhu	31.41	118.31	23.4	1991		75	97	258	276	279
Wuhu	31.41	118.31	23.4	1992
Wuhu	31.41	118.31	23.4	1993
Wuhu	31.41	118.31	23.4	1994	51	69	85	261	266	272
Wuhu	31.41	118.31	23.4	1995	69	77	90	266	277	290
Wuhu	31.41	118.31	23.4	1996	68	99	110	269	274	279
Xi'an	34.56	108.59	719	1973
Xi'an	34.56	108.59	719	1974	77	100	109
Xi'an	34.56	108.59	719	1975	70	96	99	259	263	269
Xi'an	34.56	108.59	719	1976	77	98	102	226	251	265
Xi'an	34.56	108.59	719	1977	74	95	99	250	258	277
Xi'an	34.56	108.59	719	1978	89	105	107
Xi'an	34.56	108.59	719	1979	75	93	100	247	249	254
Xi'an	34.56	108.59	719	1980	92	98	105	255	257	263
Xi'an	34.56	108.59	719	1981	73	80	85	237	239	247
Xi'an	34.56	108.59	719	1982	66	89	95	240	242	247
Xi'an	34.56	108.59	719	1983	77	94	97	236	238	247
Xi'an	34.56	108.59	719	1984	87	92	95	247		258
Xi'an	34.56	108.59	719	1985	85	95	98	249	252	270
Xi'an	34.56	108.59	719	1986	76	93	97	241	243	249
Xi'an	34.56	108.59	719	1987		89	96	264		269
Xi'an	34.56	108.59	719	1988	93	107	110
Xi'an	34.56	108.59	719	1989
Xi'an	34.56	108.59	719	1990		93		232	233	243
Xi'an	34.56	108.59	719	1991	91	98	105	245		266
Xi'an	34.56	108.59	719	1992
Xi'an	34.56	108.59	719	1993				261		267
Xi'an	34.56	108.59	719	1994		94	102	256	264	268
Xi'an	34.56	108.59	719	1995		87	98	258	261	266
Xi'an	34.56	108.59	719	1996	105	109	117	256	258	264
Table 2 Stepwise multiple linear regression coefficients of each independent variable related to phenological metrics.
BBD, date of bud-burst; FLD, date of first leaf unfolding; 50LD, date of 50% of leaf unfolding; FFD, first flowering day; PFD, peak flowering day; EFD, end of flowering day. Numbers in brackets indicate the squared semi-partial correlation coefficients. N indicates the number of phenological records.*indicates p < 0.05; b**indicates p < 0.01; and ***indicates p < 0.001.

## Sheet: Supplementary data7
SITE	Latitude	BBD	FLD	50LD	FFD	PFD	EFD
Liuzhou	24.22
Liuzhou	24.22
Liuzhou	24.22		72
Liuzhou	24.22
Liuzhou	24.22			67	267	273	282
Liuzhou	24.22	35	41	48
Liuzhou	24.22
Liuzhou	24.22
Liuzhou	24.22
Liuzhou	24.22
Liuzhou	24.22	38	46	55	291	295	310
Liuzhou	24.22
Liuzhou	24.22	35		50	306	307	308
Liuzhou	24.22	41	46	58	282	283	286
Liuzhou	24.22	48	50	65	300	306	309
Liuzhou	24.22	24	50	66	278	282	286
Liuzhou	24.22	63	69	74	296	299	305
Liuzhou	24.22	50	59	71	305	306	310
Liuzhou	24.22	42	47	55	294	296	301
Liuzhou	24.22
Liuzhou	24.22	50	57	60	283	286	291
Liuzhou	24.22	44	55	63	284	285	291
Liuzhou	24.22	45	54	61	283	285	291
Liuzhou	24.22
Guilin	25.2			65	261	288	298
Guilin	25.2	55	69	93	247	248	252
Guilin	25.2	42	51	70	294	296	297
Guilin	25.2	40	46	57	270	289	302
Guilin	25.2	58	63	67	262	263	293
Guilin	25.2	38	44	63	259	267	294
Guilin	25.2	30	37	51	274	276	283
Guilin	25.2
Guilin	25.2	21	54	75	263		270
Guilin	25.2	20	34	55	262	265	268
Guilin	25.2	39	75	81	294	301	302
Guilin	25.2		82	89	262		269
Guilin	25.2	37	61	72
Guilin	25.2	45	50	73		283	294
Guilin	25.2		38	44
Guilin	25.2	72	75	97	278	286	292
Guilin	25.2	74	79	98	282	286	293
Guilin	25.2	49	69	79	277	282	289
Guilin	25.2		71	79	280	284	293
Guilin	25.2
Guilin	25.2	43	53	77	278	287	295
Guilin	25.2				261	271	277
Guilin	25.2				279	283	289
Guilin	25.2
Changde	28.56	52	64	78	259	262	266
Changde	28.56	49	83	90	268	271	275
Changde	28.56	43	59	71	262	265	268
Changde	28.56
Changde	28.56	62	78	82
Changde	28.56	52	57	80	259	263	266
Changde	28.56	48	51	73	264	267	271
Changde	28.56	70	86	97	257	261	264
Changde	28.56	63	77	84
Changde	28.56
Changde	28.56	51	73	87	258	263	268
Changde	28.56	81	92	101	263	265	268
Changde	28.56	65	91	114	263	267	275
Changde	28.56	85	90	100	259	261	269
Changde	28.56			98	272	276	281
Changde	28.56	72	81	94	265	266
Changde	28.56	70	78	100	253	255	259
Changde	28.56	74	79	97	274	280	286
Changde	28.56	76	83	102	271	275	280
Changde	28.56
Changde	28.56
Changde	28.56
Changde	28.56
Changde	28.56
Wuhu	31.41
Wuhu	31.41
Wuhu	31.41
Wuhu	31.41
Wuhu	31.41
Wuhu	31.41
Wuhu	31.41
Wuhu	31.41
Wuhu	31.41	73	78	90	263	267	271
Wuhu	31.41	57	74	83	258	266	281
Wuhu	31.41	81	81	98	270	275	283
Wuhu	31.41	83	99	103	252	262	268
Wuhu	31.41	87	100	108	272	272	277
Wuhu	31.41		77	107	262	265	269
Wuhu	31.41	42	79	97	267	275	279
Wuhu	31.41	78	90	109	259	265	272
Wuhu	31.41		77	92	255	261
Wuhu	31.41	77	82	88	262	265	272
Wuhu	31.41		75	97	258	276	279
Wuhu	31.41
Wuhu	31.41
Wuhu	31.41	51	69	85	261	266	272
Wuhu	31.41	69	77	90	266	277	290
Wuhu	31.41	68	99	110	269	274	279
Xi'an	34.56
Xi'an	34.56	77	100	109
Xi'an	34.56	70	96	99	259	263	269
Xi'an	34.56	77	98	102	226	251	265
Xi'an	34.56	74	95	99	250	258	277
Xi'an	34.56	89	105	107
Xi'an	34.56	75	93	100	247	249	254
Xi'an	34.56	92	98	105	255	257	263
Xi'an	34.56	73	80	85	237	239	247
Xi'an	34.56	66	89	95	240	242	247
Xi'an	34.56	77	94	97	236	238	247
Xi'an	34.56	87	92	95	247		258
Xi'an	34.56	85	95	98	249	252	270
Xi'an	34.56	76	93	97	241	243	249
Xi'an	34.56		89	96	264		269
Xi'an	34.56	93	107	110
Xi'an	34.56
Xi'an	34.56		93		232	233	243
Xi'an	34.56	91	98	105	245		266
Xi'an	34.56
Xi'an	34.56				261		267
Xi'an	34.56		94	102	256	264	268
Xi'an	34.56		87	98	258	261	266
Xi'an	34.56	105	109	117	256	258	264
Figure 3 Relationship between O. fragrans phenophase and latitude. (A) BBD, (B) FLD, (C) 50LD, (D) FFD, (E) PFD, (F) EFD. BBD, date of bud-burst; FLD, date of first leaf unfolding; 50LD, date of 50% of leaf unfolding; FFD, first flowering day; PFD, peak flowering day; EFD, end of flowering day. DOY indicates the Julian day of year.

## Sheet: Supplementary data8
SITE	year	BBD	FLD	50LD	FFD	PFD	EFD
Liuzhou	1973
Liuzhou	1974
Liuzhou	1975		72
Liuzhou	1976
Liuzhou	1977			67	267	273	282
Liuzhou	1978	35	41	48
Liuzhou	1979
Liuzhou	1980
Liuzhou	1981
Liuzhou	1982
Liuzhou	1983	38	46	55	291	295	310
Liuzhou	1984
Liuzhou	1985	35		50	306	307	308
Liuzhou	1986	41	46	58	282	283	286
Liuzhou	1987	48	50	65	300	306	309
Liuzhou	1988	24	50	66	278	282	286
Liuzhou	1989	63	69	74	296	299	305
Liuzhou	1990	50	59	71	305	306	310
Liuzhou	1991	42	47	55	294	296	301
Liuzhou	1992
Liuzhou	1993	50	57	60	283	286	291
Liuzhou	1994	44	55	63	284	285	291
Liuzhou	1995	45	54	61	283	285	291
Liuzhou	1996
Guilin	1973			65	261	288	298
Guilin	1974	55	69	93	247	248	252
Guilin	1975	42	51	70	294	296	297
Guilin	1976	40	46	57	270	289	302
Guilin	1977	58	63	67	262	263	293
Guilin	1978	38	44	63	259	267	294
Guilin	1979	30	37	51	274	276	283
Guilin	1980
Guilin	1981	21	54	75	263		270
Guilin	1982	20	34	55	262	265	268
Guilin	1983	39	75	81	294	301	302
Guilin	1984		82	89	262		269
Guilin	1985	37	61	72
Guilin	1986	45	50	73		283	294
Guilin	1987		38	44
Guilin	1988	72	75	97	278	286	292
Guilin	1989	74	79	98	282	286	293
Guilin	1990	49	69	79	277	282	289
Guilin	1991		71	79	280	284	293
Guilin	1992
Guilin	1993	43	53	77	278	287	295
Guilin	1994				261	271	277
Guilin	1995				279	283	289
Guilin	1996
Changde	1973	52	64	78	259	262	266
Changde	1974	49	83	90	268	271	275
Changde	1975	43	59	71	262	265	268
Changde	1976
Changde	1977	62	78	82
Changde	1978	52	57	80	259	263	266
Changde	1979	48	51	73	264	267	271
Changde	1980	70	86	97	257	261	264
Changde	1981	63	77	84
Changde	1982
Changde	1983	51	73	87	258	263	268
Changde	1984	81	92	101	263	265	268
Changde	1985	65	91	114	263	267	275
Changde	1986	85	90	100	259	261	269
Changde	1987			98	272	276	281
Changde	1988	72	81	94	265	266
Changde	1989	70	78	100	253	255	259
Changde	1990	74	79	97	274	280	286
Changde	1991	76	83	102	271	275	280
Changde	1992
Changde	1993
Changde	1994
Changde	1995
Changde	1996
Wuhu	1973
Wuhu	1974
Wuhu	1975
Wuhu	1976
Wuhu	1977
Wuhu	1978
Wuhu	1979
Wuhu	1980
Wuhu	1981	73	78	90	263	267	271
Wuhu	1982	57	74	83	258	266	281
Wuhu	1983	81	81	98	270	275	283
Wuhu	1984	83	99	103	252	262	268
Wuhu	1985	87	100	108	272	272	277
Wuhu	1986		77	107	262	265	269
Wuhu	1987	42	79	97	267	275	279
Wuhu	1988	78	90	109	259	265	272
Wuhu	1989		77	92	255	261
Wuhu	1990	77	82	88	262	265	272
Wuhu	1991		75	97	258	276	279
Wuhu	1992
Wuhu	1993
Wuhu	1994	51	69	85	261	266	272
Wuhu	1995	69	77	90	266	277	290
Wuhu	1996	68	99	110	269	274	279
Xi'an	1973
Xi'an	1974	77	100	109
Xi'an	1975	70	96	99	259	263	269
Xi'an	1976	77	98	102	226	251	265
Xi'an	1977	74	95	99	250	258	277
Xi'an	1978	89	105	107
Xi'an	1979	75	93	100	247	249	254
Xi'an	1980	92	98	105	255	257	263
Xi'an	1981	73	80	85	237	239	247
Xi'an	1982	66	89	95	240	242	247
Xi'an	1983	77	94	97	236	238	247
Xi'an	1984	87	92	95	247		258
Xi'an	1985	85	95	98	249	252	270
Xi'an	1986	76	93	97	241	243	249
Xi'an	1987		89	96	264		269
Xi'an	1988	93	107	110
Xi'an	1989
Xi'an	1990		93		232	233	243
Xi'an	1991	91	98	105	245		266
Xi'an	1992
Xi'an	1993				261		267
Xi'an	1994		94	102	256	264	268
Xi'an	1995		87	98	258	261	266
Xi'an	1996	105	109	117	256	258	264
Figure 4 Interannual variations of (A) BBD, (B)FLD, (C) 50LD, (D) FFD, (E) PFD and (F) EFD for O. fragrans at the five observation sites and the mean observation of five sites from 1973-1996. BBD, date of bud-burst; FLD, date of first leaf unfolding; 50LD, date of 50% of leaf unfolding; FFD, first flowering day; PFD, peak flowering day; EFD, end of flowering day. DOY indicates the Julian day of y…

## Sheet: Supplementary data9
SITE	Latitude	longitude	elevation	year	TM-5	PPT	SSH	BBD	FLD	50LD	25-TM	PPT1	SSH1	FFD	PFD	EFD
Liuzhou	24.22	109.23	96.9	1973	1309.3	319.9	246				116.6	434.2	747.4
Liuzhou	24.22	109.23	96.9	1974	1089.7	303.7	386.9				75.3	810.2	778.5
Liuzhou	24.22	109.23	96.9	1975	1282.5	343.4	208.6		72		98.6	415.9	790
Liuzhou	24.22	109.23	96.9	1976	1097.6	244.3	245.4				122.5	759.6	685.9
Liuzhou	24.22	109.23	96.9	1977	1115.3	184.2	287.1			67	82.4	636.2	764.7	267	273	282
Liuzhou	24.22	109.23	96.9	1978	1226	266	272.1	35	41	48	76.3	290.9	836.7
Liuzhou	24.22	109.23	96.9	1979	1274	486.4	197.1				69.5	467.1	896
Liuzhou	24.22	109.23	96.9	1980	1025.9	378.3	139.5				75.8	598.6	857.6
Liuzhou	24.22	109.23	96.9	1981	1262.4	472.3	243.9				118.7	401.2	734.4
Liuzhou	24.22	109.23	96.9	1982	1178	325.3	165.4				58.1	728	756.1
Liuzhou	24.22	109.23	96.9	1983	1076.6	474.2	292.4	38	46	55	80.4	719.9	815.6	291	295	310
Liuzhou	24.22	109.23	96.9	1984	933.1	243.2	183				144.5	388.7	773.2
Liuzhou	24.22	109.23	96.9	1985	987.9	353.9	194.1	35		50	78.4	249	839.1	306	307	308
Liuzhou	24.22	109.23	96.9	1986	1217.8	294.8	301.6	41	46	58	121.7	405.4	809	282	283	286
Liuzhou	24.22	109.23	96.9	1987	1448.9	147.3	337.4	48	50	65	105.5	474.2	732.4	300	306	309
Liuzhou	24.22	109.23	96.9	1988	966.4	251.7	201.9	24	50	66	97.9	400.2	716	278	282	286
Liuzhou	24.22	109.23	96.9	1989	1100.2	395.8	189.5	63	69	74	66.9	321.9	802.2	296	299	305
Liuzhou	24.22	109.23	96.9	1990	1199.9	484.7	198.9	50	59	71	64.2	343.5	784.8	305	306	310
Liuzhou	24.22	109.23	96.9	1991	1197.5	159.8	156.8	42	47	55	102.5	239.5	779.6	294	296	301
Liuzhou	24.22	109.23	96.9	1992	1125.9	320.8	270.8				111.6	283.4	815.7
Liuzhou	24.22	109.23	96.9	1993	1170.2	378.6	252.6	50	57	60	118.1	577.3	680.8	283	286	291
Liuzhou	24.22	109.23	96.9	1994	1183.1	261	171.3	44	55	63	152.6	1049.7	578.1	284	285	291
Liuzhou	24.22	109.23	96.9	1995	1120	366.2	125.9	45	54	61	72.2	368.6	756	283	285	291
Liuzhou	24.22	109.23	96.9	1996	1002.7	487.3	274.1				57.5	683.2	784.8
Guilin	25.2	110.18	166.7	1973	989.8	627.4	188.6			65	176.8	586.4	782.4	261	288	298
Guilin	25.2	110.18	166.7	1974	894.7	502.8	426.9	55	69	93	133.6	655.6	820.2	247	248	252
Guilin	25.2	110.18	166.7	1975	966.9	740	206.9	42	51	70	148.4	408.7	827.9	294	296	297
Guilin	25.2	110.18	166.7	1976	806.8	360.7	227.6	40	46	57	185	1033.1	762.7	270	289	302
Guilin	25.2	110.18	166.7	1977	899.1	335.2	336.4	58	63	67	144.8	706.5	794.2	262	263	293
Guilin	25.2	110.18	166.7	1978	917.3	626.8	249.5	38	44	63	157.7	269.6	935.6	259	267	294
Guilin	25.2	110.18	166.7	1979	994.5	501.5	245.3	30	37	51	155.8	419.9	750.3	274	276	283
Guilin	25.2	110.18	166.7	1980	725	722.1	124.2				142.9	732.3	692.9
Guilin	25.2	110.18	166.7	1981	952.4	777.5	170.3	21	54	75	216.2	447.4	668.8	263		270
Guilin	25.2	110.18	166.7	1982	867.4	606	197.9	20	34	55	134.8	532.4	678.2	262	265	268
Guilin	25.2	110.18	166.7	1983	819.7	467.3	252.2	39	75	81	130.6	652.1	691.3	294	301	302
Guilin	25.2	110.18	166.7	1984	727.3	293.2	163.6		82	89	211.3	427.1	701.8	262		269
Guilin	25.2	110.18	166.7	1985	772.8	567.7	216.6	37	61	72	165.4	438.3	607.6
Guilin	25.2	110.18	166.7	1986	919.6	369.6	237.2	45	50	73	175.5	612.9	845.6		283	294
Guilin	25.2	110.18	166.7	1987	1066.7	525.3	340.5		38	44	166.6	670.1	666.2
Guilin	25.2	110.18	166.7	1988	714.7	331.9	225.4	72	75	97	183.1	593.4	685.6	278	286	292
Guilin	25.2	110.18	166.7	1989	814.4	553.2	199.5	74	79	98	132.1	423.2	830.3	282	286	293
Guilin	25.2	110.18	166.7	1990	891.8	723.6	188.4	49	69	79	140.9	335.8	808.2	277	282	289
Guilin	25.2	110.18	166.7	1991	868.7	487.3	145.1		71	79	159.7	389.6	769.8	280	284	293
Guilin	25.2	110.18	166.7	1992	887.3	600.7	283.6				177.5	304	891.2
Guilin	25.2	110.18	166.7	1993	914.5	682.8	272.5	43	53	77	200	930	674.4	278	287	295
Guilin	25.2	110.18	166.7	1994	909.2	486.3	216.3				246	796.8	653.8	261	271	277
Guilin	25.2	110.18	166.7	1995	886.8	563.7	187				141.5	336.5	792.7	279	283	289
Guilin	25.2	110.18	166.7	1996	780.6	793.2	282.4				115.2	587.4	790.4
Changde	28.56	111.33	35	1973	671.9	345.4	265.2	52	64	78	334.9	756.3	683.6	259	262	266
Changde	28.56	111.33	35	1974	654.4	333.4	288.2	49	83	90	333	226	787.3	268	271	275
Changde	28.56	111.33	35	1975	643	415.6	218.2	43	59	71	254.4	474.5	712.4	262	265	268
Changde	28.56	111.33	35	1976	536	316.6	324.2				302.1	325	794
Changde	28.56	111.33	35	1977	681.6	444.7	384.9	62	78	82	258.2	444.2	754.5
Changde	28.56	111.33	35	1978	648.4	296.3	445.9	52	57	80	289.4	270.8	909.7	259	263	266
Changde	28.56	111.33	35	1979	683.2	207.1	480.6	48	51	73	282.8	252	778.4	264	267	271
Changde	28.56	111.33	35	1980	484.9	472.7	271.8	70	86	97	342	725.3	605.5	257	261	264
Changde	28.56	111.33	35	1981	655	431.6	341.1	63	77	84	388.7	343.8	754.3
Changde	28.56	111.33	35	1982	570.8	481.2	300.5				332	453.6	530.5
Changde	28.56	111.33	35	1983	582.9	335.5	284.3	51	73	87	308.5	474.3	542.8	258	263	268
Changde	28.56	111.33	35	1984	533.3	377.8	297.8	81	92	101	339.3	462.2	687.7	263	265	268
Changde	28.56	111.33	35	1985	549.2	363.3	292.4	65	91	114	313.6	311.9	688	263	267	275
Changde	28.56	111.33	35	1986	633.7	382.8	342.5	85	90	100	329.1	385.6	678.6	259	261	269
Changde	28.56	111.33	35	1987	635.9	341.9	361.7			98	263.7	410.4	666.9	272	276	281
Changde	28.56	111.33	35	1988	570.6	225.7	382.9	72	81	94	317.7	608.2	745.4	265	266
Changde	28.56	111.33	35	1989	550.9	582.9	288.2	70	78	100	297.7	646.5	696.8	253	255	259
Changde	28.56	111.33	35	1990	590.1	389.5	331.8	74	79	97	232.9	308.6	962	274	280	286
Changde	28.56	111.33	35	1991	533.9	530.2	309.4	76	83	102	269.2	377.4	822	271	275	280
Changde	28.56	111.33	35	1992	667.6	482.3	435.8				331.7	329.3	845.2
Changde	28.56	111.33	35	1993	666.2	469.1	446.5				308.7	750.4	656.1
Changde	28.56	111.33	35	1994	637.7	402.5	351.3				354.6	537.1	733.7
Changde	28.56	111.33	35	1995	642.5	476.6	387.4				275.1	366.7	789.5
Changde	28.56	111.33	35	1996	601.5	283.9	385.1				248.8	390	677.8
Wuhu	31.41	118.31	23.4	1973	567.3	279.7	470.2				360.8	269.9	876.3
Wuhu	31.41	118.31	23.4	1974	515.5	180.8	640.7				349.5	392.4	773.3
Wuhu	31.41	118.31	23.4	1975	481	233.1	540.4				249.3	500.1	663.9
Wuhu	31.41	118.31	23.4	1976	459.8	258.2	607.3				342.1	256.3	849
Wuhu	31.41	118.31	23.4	1977	548.3	261.8	490.1				273	545.9	780.6
Wuhu	31.41	118.31	23.4	1978	509.1	143.3	656.5				300.2	139.1	978.5
Wuhu	31.41	118.31	23.4	1979	555.7	253.8	586.5				322.6	467.7	871.5
Wuhu	31.41	118.31	23.4	1980	391	273.2	511.2				397.2	687.4	588.8
Wuhu	31.41	118.31	23.4	1981	525.2	238.3	499.3	73	78	90	397.8	561.8	751.6	263	267	271
Wuhu	31.41	118.31	23.4	1982	446.4	228.8	518.7	57	74	83	328.5	679	623.7	258	266	281
Wuhu	31.41	118.31	23.4	1983	458.3	212.2	613.9	81	81	98	296	593.4	743.2	270	275	283
Wuhu	31.41	118.31	23.4	1984	405.3	184.2	547.3	83	99	103	341	320.7	788.8	252	262	268
Wuhu	31.41	118.31	23.4	1985	426.4	216.4	549.8	87	100	108	320.3	502.9	710.2	272	272	277
Wuhu	31.41	118.31	23.4	1986	448.7	128.4	569.7		77	107	367	220.6	752.9	262	265	269
Wuhu	31.41	118.31	23.4	1987	458.4	392.1	548.7	42	79	97	287.1	801.4	681.6	267	275	279
Wuhu	31.41	118.31	23.4	1988	441.2	229.9	530.3	78	90	109	332	304.4	843.4	259	265	272
Wuhu	31.41	118.31	23.4	1989	492.6	312.9	463.6		77	92	329.9	593.4	725.6	255	261
Wuhu	31.41	118.31	23.4	1990	532	313.5	504.9	77	82	88	307.4	259.1	831.2	262	265	272
Wuhu	31.41	118.31	23.4	1991	415.4	420.4	449.9		75	97	331.3	916.2	803.6	258	276	279
Wuhu	31.41	118.31	23.4	1992	517.1	326.1	582.6				370	337	784.2
Wuhu	31.41	118.31	23.4	1993	507.8	369.7	593.7				348.7	427.4	666.2
Wuhu	31.41	118.31	23.4	1994	514.1	222.3	498.3	51	69	85	303	281.9	825.5	261	266	272
Wuhu	31.41	118.31	23.4	1995	507.5	197.4	615.5	69	77	90	306.4	297.4	803.7	266	277	290
Wuhu	31.41	118.31	23.4	1996	436.7	270.5	526.6	68	99	110	273.3	592.6	639.7	269	274	279
Xi'an	34.56	108.59	719	1973	439.4	49.2	645.8				689.3	325	883.7
Xi'an	34.56	108.59	719	1974	357.4	45	648.5	77	100	109	682.8	307.4	868.3
Xi'an	34.56	108.59	719	1975	304.3	94.6	641.2	70	96	99	642.3	513.9	701.4	259	263	269
Xi'an	34.56	108.59	719	1976	244.4	107.5	629.9	77	98	102	701.7	446	765.7	226	251	265
Xi'an	34.56	108.59	719	1977	450.3	51.6	727.6	74	95	99	520.4	206.5	871.8	250	258	277
Xi'an	34.56	108.59	719	1978	399.4	37.6	803.2	89	105	107	644.1	512	879.6
Xi'an	34.56	108.59	719	1979	333.6	25	755.6	75	93	100	636.8	325.3	836.9	247	249	254
Xi'an	34.56	108.59	719	1980	329.3	35.5	731.7	92	98	105	703.5	309.5	765.9	255	257	263
Xi'an	34.56	108.59	719	1981	398.7	74	738.2	73	80	85	785.6	551.6	636.4	237	239	247
Xi'an	34.56	108.59	719	1982	338.1	57.5	694.4	66	89	95	693.5	414	704.5	240	242	247
Xi'an	34.56	108.59	719	1983	323.6	81.4	725.4	77	94	97	731.3	522.7	479.3	236	238	247
Xi'an	34.56	108.59	719	1984	331.4	37.2	612	87	92	95	783.4	449.3	762.8	247		258
Xi'an	34.56	108.59	719	1985	306.8	49.6	593.5	85	95	98	712.7	330.5	562.7	249	252	270
Xi'an	34.56	108.59	719	1986	325.6	46.9	699.2	76	93	97	660.3	216.9	835.2	241	243	249
Xi'an	34.56	108.59	719	1987	356.6	61.6	724.3		89	96	508.4	191	852	264		269
Xi'an	34.56	108.59	719	1988	285.1	101	630.6	93	107	110	695.1	571.5	592.7
Xi'an	34.56	108.59	719	1989	318.7	124	502.3				646.3	346.1	689.9
Xi'an	34.56	108.59	719	1990	311.1	111.8	590.4		93		567.6	211	867.2	232	233	243
Xi'an	34.56	108.59	719	1991	305.9	108	621.5	91	98	105	571.5	161.9	967.1	245		266
Xi'an	34.56	108.59	719	1992	382.9	61.5	783.3				742.3	324	657.8
Xi'an	34.56	108.59	719	1993	347.6	61	652.3				675.9	210.3	793.3	261		267
Xi'an	34.56	108.59	719	1994	360.7	96.3	695.7		94	102	616.7	207.7	947.2	256	264	268
Xi'an	34.56	108.59	719	1995	323.9	42.8	737.9		87	98	589.8	312.6	733.9	258	261	266
Xi'an	34.56	108.59	719	1996	276.8	50.3	673.7	105	109	117	632.4	423.6	720.8	256	258	264
Table S3. Correlation coefficient of phenological metrices with climatic factors. BBD, date of bud-burst; FLD, date of first leaf unfolding; 50LD, date of 50% of leaf unfolding; FFD, first flowering day; PFD, peak flowering day; EFD, end of flowering day. CDD, PPT and SSD indicate cold degree-days, accumulated precipitation and sunshine duration, respectively. All climatic factors (GDD, PPT and S…

## Sheet: Supplementary data10
SITE	Latitude	longitude	elevation	year	TM-5	PPT	SSH	BBD	FLD	50LD	25-TM	PPT1	SSH1	FFD	PFD	EFD
Liuzhou	24.22	109.23	96.9	1973	1309.3	319.9	246				116.6	434.2	747.4
Liuzhou	24.22	109.23	96.9	1974	1089.7	303.7	386.9				75.3	810.2	778.5
Liuzhou	24.22	109.23	96.9	1975	1282.5	343.4	208.6		72		98.6	415.9	790
Liuzhou	24.22	109.23	96.9	1976	1097.6	244.3	245.4				122.5	759.6	685.9
Liuzhou	24.22	109.23	96.9	1977	1115.3	184.2	287.1			67	82.4	636.2	764.7	267	273	282
Liuzhou	24.22	109.23	96.9	1978	1226	266	272.1	35	41	48	76.3	290.9	836.7
Liuzhou	24.22	109.23	96.9	1979	1274	486.4	197.1				69.5	467.1	896
Liuzhou	24.22	109.23	96.9	1980	1025.9	378.3	139.5				75.8	598.6	857.6
Liuzhou	24.22	109.23	96.9	1981	1262.4	472.3	243.9				118.7	401.2	734.4
Liuzhou	24.22	109.23	96.9	1982	1178	325.3	165.4				58.1	728	756.1
Liuzhou	24.22	109.23	96.9	1983	1076.6	474.2	292.4	38	46	55	80.4	719.9	815.6	291	295	310
Liuzhou	24.22	109.23	96.9	1984	933.1	243.2	183				144.5	388.7	773.2
Liuzhou	24.22	109.23	96.9	1985	987.9	353.9	194.1	35		50	78.4	249	839.1	306	307	308
Liuzhou	24.22	109.23	96.9	1986	1217.8	294.8	301.6	41	46	58	121.7	405.4	809	282	283	286
Liuzhou	24.22	109.23	96.9	1987	1448.9	147.3	337.4	48	50	65	105.5	474.2	732.4	300	306	309
Liuzhou	24.22	109.23	96.9	1988	966.4	251.7	201.9	24	50	66	97.9	400.2	716	278	282	286
Liuzhou	24.22	109.23	96.9	1989	1100.2	395.8	189.5	63	69	74	66.9	321.9	802.2	296	299	305
Liuzhou	24.22	109.23	96.9	1990	1199.9	484.7	198.9	50	59	71	64.2	343.5	784.8	305	306	310
Liuzhou	24.22	109.23	96.9	1991	1197.5	159.8	156.8	42	47	55	102.5	239.5	779.6	294	296	301
Liuzhou	24.22	109.23	96.9	1992	1125.9	320.8	270.8				111.6	283.4	815.7
Liuzhou	24.22	109.23	96.9	1993	1170.2	378.6	252.6	50	57	60	118.1	577.3	680.8	283	286	291
Liuzhou	24.22	109.23	96.9	1994	1183.1	261	171.3	44	55	63	152.6	1049.7	578.1	284	285	291
Liuzhou	24.22	109.23	96.9	1995	1120	366.2	125.9	45	54	61	72.2	368.6	756	283	285	291
Liuzhou	24.22	109.23	96.9	1996	1002.7	487.3	274.1				57.5	683.2	784.8
Guilin	25.2	110.18	166.7	1973	989.8	627.4	188.6			65	176.8	586.4	782.4	261	288	298
Guilin	25.2	110.18	166.7	1974	894.7	502.8	426.9	55	69	93	133.6	655.6	820.2	247	248	252
Guilin	25.2	110.18	166.7	1975	966.9	740	206.9	42	51	70	148.4	408.7	827.9	294	296	297
Guilin	25.2	110.18	166.7	1976	806.8	360.7	227.6	40	46	57	185	1033.1	762.7	270	289	302
Guilin	25.2	110.18	166.7	1977	899.1	335.2	336.4	58	63	67	144.8	706.5	794.2	262	263	293
Guilin	25.2	110.18	166.7	1978	917.3	626.8	249.5	38	44	63	157.7	269.6	935.6	259	267	294
Guilin	25.2	110.18	166.7	1979	994.5	501.5	245.3	30	37	51	155.8	419.9	750.3	274	276	283
Guilin	25.2	110.18	166.7	1980	725	722.1	124.2				142.9	732.3	692.9
Guilin	25.2	110.18	166.7	1981	952.4	777.5	170.3	21	54	75	216.2	447.4	668.8	263		270
Guilin	25.2	110.18	166.7	1982	867.4	606	197.9	20	34	55	134.8	532.4	678.2	262	265	268
Guilin	25.2	110.18	166.7	1983	819.7	467.3	252.2	39	75	81	130.6	652.1	691.3	294	301	302
Guilin	25.2	110.18	166.7	1984	727.3	293.2	163.6		82	89	211.3	427.1	701.8	262		269
Guilin	25.2	110.18	166.7	1985	772.8	567.7	216.6	37	61	72	165.4	438.3	607.6
Guilin	25.2	110.18	166.7	1986	919.6	369.6	237.2	45	50	73	175.5	612.9	845.6		283	294
Guilin	25.2	110.18	166.7	1987	1066.7	525.3	340.5		38	44	166.6	670.1	666.2
Guilin	25.2	110.18	166.7	1988	714.7	331.9	225.4	72	75	97	183.1	593.4	685.6	278	286	292
Guilin	25.2	110.18	166.7	1989	814.4	553.2	199.5	74	79	98	132.1	423.2	830.3	282	286	293
Guilin	25.2	110.18	166.7	1990	891.8	723.6	188.4	49	69	79	140.9	335.8	808.2	277	282	289
Guilin	25.2	110.18	166.7	1991	868.7	487.3	145.1		71	79	159.7	389.6	769.8	280	284	293
Guilin	25.2	110.18	166.7	1992	887.3	600.7	283.6				177.5	304	891.2
Guilin	25.2	110.18	166.7	1993	914.5	682.8	272.5	43	53	77	200	930	674.4	278	287	295
Guilin	25.2	110.18	166.7	1994	909.2	486.3	216.3				246	796.8	653.8	261	271	277
Guilin	25.2	110.18	166.7	1995	886.8	563.7	187				141.5	336.5	792.7	279	283	289
Guilin	25.2	110.18	166.7	1996	780.6	793.2	282.4				115.2	587.4	790.4
Changde	28.56	111.33	35	1973	671.9	345.4	265.2	52	64	78	334.9	756.3	683.6	259	262	266
Changde	28.56	111.33	35	1974	654.4	333.4	288.2	49	83	90	333	226	787.3	268	271	275
Changde	28.56	111.33	35	1975	643	415.6	218.2	43	59	71	254.4	474.5	712.4	262	265	268
Changde	28.56	111.33	35	1976	536	316.6	324.2				302.1	325	794
Changde	28.56	111.33	35	1977	681.6	444.7	384.9	62	78	82	258.2	444.2	754.5
Changde	28.56	111.33	35	1978	648.4	296.3	445.9	52	57	80	289.4	270.8	909.7	259	263	266
Changde	28.56	111.33	35	1979	683.2	207.1	480.6	48	51	73	282.8	252	778.4	264	267	271
Changde	28.56	111.33	35	1980	484.9	472.7	271.8	70	86	97	342	725.3	605.5	257	261	264
Changde	28.56	111.33	35	1981	655	431.6	341.1	63	77	84	388.7	343.8	754.3
Changde	28.56	111.33	35	1982	570.8	481.2	300.5				332	453.6	530.5
Changde	28.56	111.33	35	1983	582.9	335.5	284.3	51	73	87	308.5	474.3	542.8	258	263	268
Changde	28.56	111.33	35	1984	533.3	377.8	297.8	81	92	101	339.3	462.2	687.7	263	265	268
Changde	28.56	111.33	35	1985	549.2	363.3	292.4	65	91	114	313.6	311.9	688	263	267	275
Changde	28.56	111.33	35	1986	633.7	382.8	342.5	85	90	100	329.1	385.6	678.6	259	261	269
Changde	28.56	111.33	35	1987	635.9	341.9	361.7			98	263.7	410.4	666.9	272	276	281
Changde	28.56	111.33	35	1988	570.6	225.7	382.9	72	81	94	317.7	608.2	745.4	265	266
Changde	28.56	111.33	35	1989	550.9	582.9	288.2	70	78	100	297.7	646.5	696.8	253	255	259
Changde	28.56	111.33	35	1990	590.1	389.5	331.8	74	79	97	232.9	308.6	962	274	280	286
Changde	28.56	111.33	35	1991	533.9	530.2	309.4	76	83	102	269.2	377.4	822	271	275	280
Changde	28.56	111.33	35	1992	667.6	482.3	435.8				331.7	329.3	845.2
Changde	28.56	111.33	35	1993	666.2	469.1	446.5				308.7	750.4	656.1
Changde	28.56	111.33	35	1994	637.7	402.5	351.3				354.6	537.1	733.7
Changde	28.56	111.33	35	1995	642.5	476.6	387.4				275.1	366.7	789.5
Changde	28.56	111.33	35	1996	601.5	283.9	385.1				248.8	390	677.8
Wuhu	31.41	118.31	23.4	1973	567.3	279.7	470.2				360.8	269.9	876.3
Wuhu	31.41	118.31	23.4	1974	515.5	180.8	640.7				349.5	392.4	773.3
Wuhu	31.41	118.31	23.4	1975	481	233.1	540.4				249.3	500.1	663.9
Wuhu	31.41	118.31	23.4	1976	459.8	258.2	607.3				342.1	256.3	849
Wuhu	31.41	118.31	23.4	1977	548.3	261.8	490.1				273	545.9	780.6
Wuhu	31.41	118.31	23.4	1978	509.1	143.3	656.5				300.2	139.1	978.5
Wuhu	31.41	118.31	23.4	1979	555.7	253.8	586.5				322.6	467.7	871.5
Wuhu	31.41	118.31	23.4	1980	391	273.2	511.2				397.2	687.4	588.8
Wuhu	31.41	118.31	23.4	1981	525.2	238.3	499.3	73	78	90	397.8	561.8	751.6	263	267	271
Wuhu	31.41	118.31	23.4	1982	446.4	228.8	518.7	57	74	83	328.5	679	623.7	258	266	281
Wuhu	31.41	118.31	23.4	1983	458.3	212.2	613.9	81	81	98	296	593.4	743.2	270	275	283
Wuhu	31.41	118.31	23.4	1984	405.3	184.2	547.3	83	99	103	341	320.7	788.8	252	262	268
Wuhu	31.41	118.31	23.4	1985	426.4	216.4	549.8	87	100	108	320.3	502.9	710.2	272	272	277
Wuhu	31.41	118.31	23.4	1986	448.7	128.4	569.7		77	107	367	220.6	752.9	262	265	269
Wuhu	31.41	118.31	23.4	1987	458.4	392.1	548.7	42	79	97	287.1	801.4	681.6	267	275	279
Wuhu	31.41	118.31	23.4	1988	441.2	229.9	530.3	78	90	109	332	304.4	843.4	259	265	272
Wuhu	31.41	118.31	23.4	1989	492.6	312.9	463.6		77	92	329.9	593.4	725.6	255	261
Wuhu	31.41	118.31	23.4	1990	532	313.5	504.9	77	82	88	307.4	259.1	831.2	262	265	272
Wuhu	31.41	118.31	23.4	1991	415.4	420.4	449.9		75	97	331.3	916.2	803.6	258	276	279
Wuhu	31.41	118.31	23.4	1992	517.1	326.1	582.6				370	337	784.2
Wuhu	31.41	118.31	23.4	1993	507.8	369.7	593.7				348.7	427.4	666.2
Wuhu	31.41	118.31	23.4	1994	514.1	222.3	498.3	51	69	85	303	281.9	825.5	261	266	272
Wuhu	31.41	118.31	23.4	1995	507.5	197.4	615.5	69	77	90	306.4	297.4	803.7	266	277	290
Wuhu	31.41	118.31	23.4	1996	436.7	270.5	526.6	68	99	110	273.3	592.6	639.7	269	274	279
Xi'an	34.56	108.59	719	1973	439.4	49.2	645.8				689.3	325	883.7
Xi'an	34.56	108.59	719	1974	357.4	45	648.5	77	100	109	682.8	307.4	868.3
Xi'an	34.56	108.59	719	1975	304.3	94.6	641.2	70	96	99	642.3	513.9	701.4	259	263	269
Xi'an	34.56	108.59	719	1976	244.4	107.5	629.9	77	98	102	701.7	446	765.7	226	251	265
Xi'an	34.56	108.59	719	1977	450.3	51.6	727.6	74	95	99	520.4	206.5	871.8	250	258	277
Xi'an	34.56	108.59	719	1978	399.4	37.6	803.2	89	105	107	644.1	512	879.6
Xi'an	34.56	108.59	719	1979	333.6	25	755.6	75	93	100	636.8	325.3	836.9	247	249	254
Xi'an	34.56	108.59	719	1980	329.3	35.5	731.7	92	98	105	703.5	309.5	765.9	255	257	263
Xi'an	34.56	108.59	719	1981	398.7	74	738.2	73	80	85	785.6	551.6	636.4	237	239	247
Xi'an	34.56	108.59	719	1982	338.1	57.5	694.4	66	89	95	693.5	414	704.5	240	242	247
Xi'an	34.56	108.59	719	1983	323.6	81.4	725.4	77	94	97	731.3	522.7	479.3	236	238	247
Xi'an	34.56	108.59	719	1984	331.4	37.2	612	87	92	95	783.4	449.3	762.8	247		258
Xi'an	34.56	108.59	719	1985	306.8	49.6	593.5	85	95	98	712.7	330.5	562.7	249	252	270
Xi'an	34.56	108.59	719	1986	325.6	46.9	699.2	76	93	97	660.3	216.9	835.2	241	243	249
Xi'an	34.56	108.59	719	1987	356.6	61.6	724.3		89	96	508.4	191	852	264		269
Xi'an	34.56	108.59	719	1988	285.1	101	630.6	93	107	110	695.1	571.5	592.7
Xi'an	34.56	108.59	719	1989	318.7	124	502.3				646.3	346.1	689.9
Xi'an	34.56	108.59	719	1990	311.1	111.8	590.4		93		567.6	211	867.2	232	233	243
Xi'an	34.56	108.59	719	1991	305.9	108	621.5	91	98	105	571.5	161.9	967.1	245		266
Xi'an	34.56	108.59	719	1992	382.9	61.5	783.3				742.3	324	657.8
Xi'an	34.56	108.59	719	1993	347.6	61	652.3				675.9	210.3	793.3	261		267
Xi'an	34.56	108.59	719	1994	360.7	96.3	695.7		94	102	616.7	207.7	947.2	256	264	268
Xi'an	34.56	108.59	719	1995	323.9	42.8	737.9		87	98	589.8	312.6	733.9	258	261	266
Xi'an	34.56	108.59	719	1996	276.8	50.3	673.7	105	109	117	632.4	423.6	720.8	256	258	264
Table 3 Partial correlation coefficients between the phenological metrics and climatic factors across all stations and years.
BBD, date of bud-burst; FLD, date of first leaf unfolding; 50LD, date of 50% of leaf unfolding; FFD, first flowering day; PFD, peak flowering day; EFD, end of flowering day. GDD, CDD, PPT and SSD indicate the growing degree-days, cold degree-days, accumulated precipitation and sunshine duration, respectively. All climatic factors (GDD, CDD, PPT and SSD) for BBD, FLD, 50LD, FFD, PFD and EFD were c…

[truncated: 1 more sheets: Supplementary data11]
